# Supplementary material for: S100A8/S100A9 Promote Progression of Multiple Myeloma via Expansion of Megakaryocytes
Source: PubMed Central journal article supplement (PMC10010194; doi:10.1158/2767-9764.crc-22-0368), 2023-03-13
Supplement: crc-22-0368-s04.pdf [file crc-22-0368-s04.pdf]

**Supplementary Figure S3**

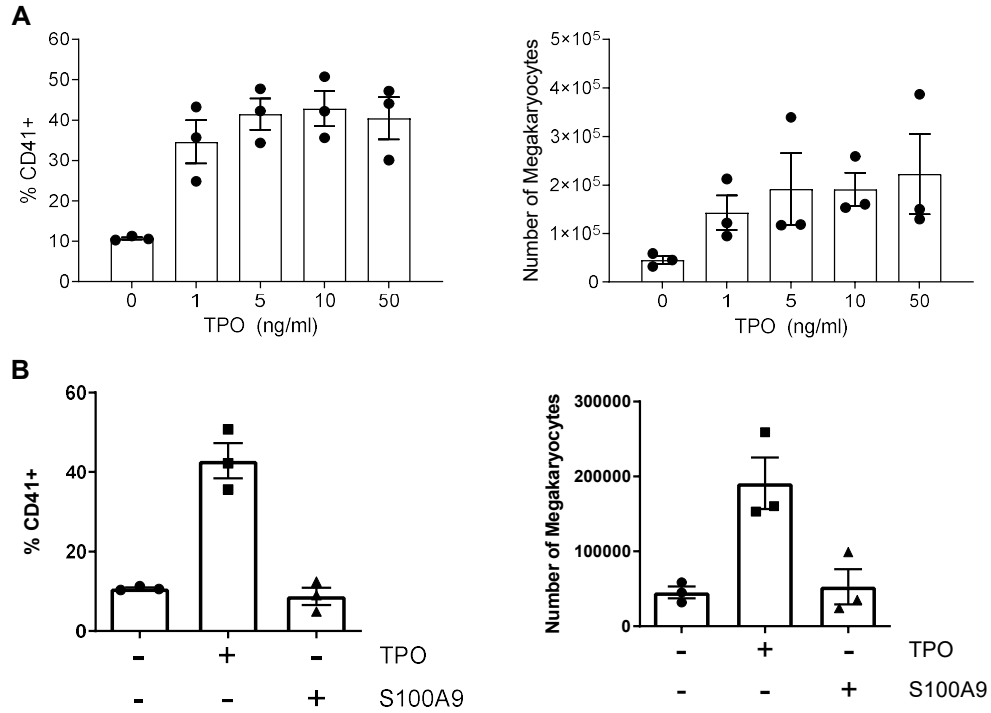

**Supplementary Figure S3. Effect of TPO and S100A9 on *in vitro* MK differentiation.** BM cells isolated from WT mice were cultured in the presence of indicated concentrations of TPO (A) or 5  $\mu$ g/mL S100A9 protein (B). Presence and number of MK were determined on day 5 of culture. Individual values from independent experiments, mean, and SEM values are shown.
