# Supplementary material for: S100A8/S100A9 Promote Progression of Multiple Myeloma via Expansion of Megakaryocytes
Source: PubMed Central journal article supplement (PMC10010194; doi:10.1158/2767-9764.crc-22-0368), 2023-03-13
Supplement: crc-22-0368-s07.pdf [file crc-22-0368-s07.pdf]

**Supplementary Figure S6**

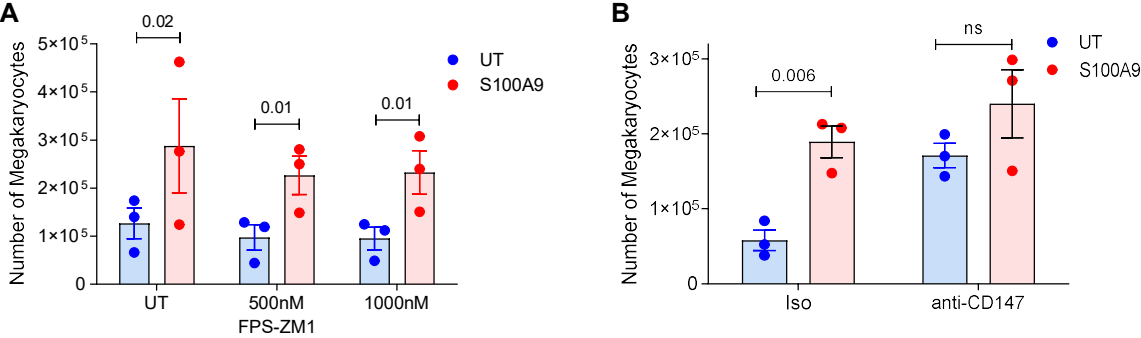

**Supplementary Figure S6. Mechanism of S100A9 effect on MK differentiation.** BM cells were isolated from WT mice and cultured in the presence of TPO with or without S100A9. RAGE inhibitor (A), anti-CD147 Ab (10µg/ml) or isotype control (B) were added to the cultures on day 0. Number of MKs was determined on day 5 of culture. Individual values, mean, and SEM values are shown. UT – untreated (no S100A9 added).
