# Supplementary material for: S100A8/S100A9 Promote Progression of Multiple Myeloma via Expansion of Megakaryocytes
Source: PubMed Central journal article supplement (PMC10010194; doi:10.1158/2767-9764.crc-22-0368), 2023-03-13
Supplement: crc-22-0368-s08.pdf [file crc-22-0368-s08.pdf]

### Supplementary Figure S7

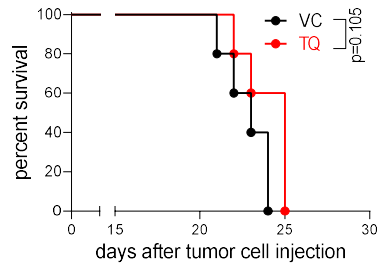

**Supplementary Figure S7. Effect of TQ in S100A9KO MM-bearing mice.** DP42-bearing S100A9KO mice were treated with TQ (30 mg/kg/day in drinking water, n=5) or vehicle control (n=5). Survival of mice was evaluated. Statistics: log-rank test.
