# Supplementary material for: S100A8/S100A9 Promote Progression of Multiple Myeloma via Expansion of Megakaryocytes
Source: PubMed Central journal article supplement (PMC10010194; doi:10.1158/2767-9764.crc-22-0368), 2023-03-13
Supplement: crc-22-0368-s09.pdf [file crc-22-0368-s09.pdf]

## Supplementary Figure S8

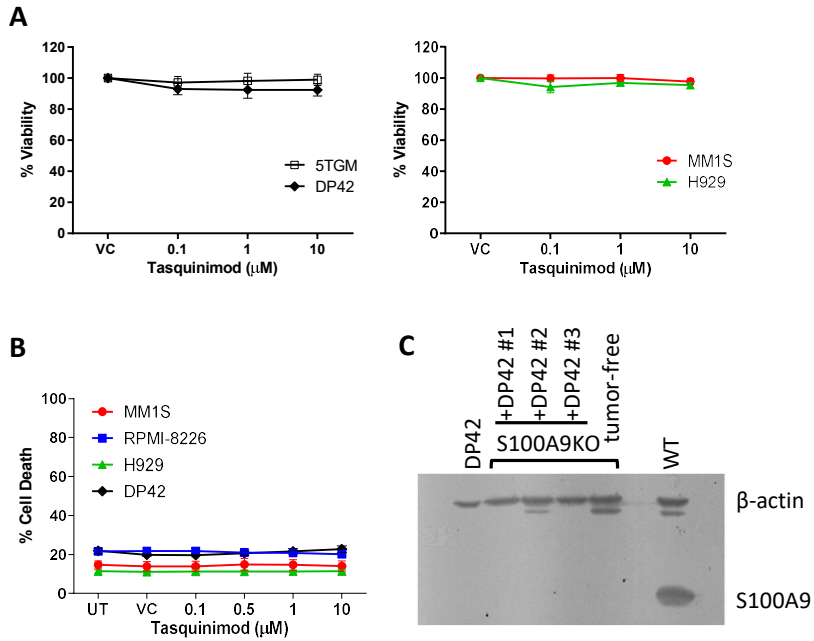

**Supplementary Figure S8. Effect of TQ on MM cells.** (A) Viability of MM cells was determined by MTT assay after 48h treatment with indicated concentrations of TQ or vehicle control (VC, DMSO). (B) Apoptosis of MM cells evaluated by Annexin V binding assay after 24h of treatment with TQ or VC. UT – untreated cells. Individual values, mean, and SEM values are shown. (C) Expression of S100A9 protein was determined by western blotting in DP42 cells cultured *in vitro* (DP42) and in BM cells from 3 individual DP42-bearing S100A9KO mice isolated 2 weeks after tumor cell injection (S100A9KO+DP42). In control, BM cells isolated from tumor-free S100A9KO mice and WT mice were used.
